# Supplementary material for: Hypergravity hinders axonal development of motor neurons in Caenorhabditis elegans
Source: PeerJ. 2016 Nov 3;4:e2666. doi: 10.7717/peerj.2666 (PMC5101602; doi:10.7717/peerj.2666)
Supplement: Supplemental Information 1 [file peerj-04-2666-s001.xlsx]

## Sheet: Fig. I
	eggs centrifuge for 2.5 days
	unc-25::gfp
		normal	defect	total	% of defective worms	defective axon	total axons	total defective
3.3.2015	control	91	28	119	23.5294	32	2142	1.49393
	100g-2.5	18	45	63	71.4286	58	1134	5.11464
26.2.2015	control	71	29	100	29	43	1800	2.38889
	100g-2.5	29	48	77	62.3377	72	1386	5.19481
22.1.2015	control	96	24	120	20	30	2160	1.38889
	100g-2.5	73	93	166	56.0241	139	2988	4.65194
23.2.2015	control	96	12	108	11.1111	13	1944	0.668724
	100g-2.5	48	71	119	59.6639	117	2142	5.46218
		% of worms with axonal defects
			1G	100G
		1	23.5294	71.4286
		2	29	62.3377
		3	20	56.0241
		4	11.1111	59.6639
		average	20.9101	62.3635
		std.dev	7.50901	6.574
		var	56.3852	43.2174
		trial	4	4
		sqrt	2	2
		std.error	3.75451	3.287
		ttest		0.00016498

## Sheet: fig. 1J
Fig. J
		% of defective axon
		1G	100G
		1.49393	5.11464
		2.38889	5.19481
		1.26263	4.65194
		0.668724	5.46218
	average	1.45354	5.10589
	stdev	0.713884	0.337144
	trial	4	4
	sqrt	2	2
	stderroe	0.356942	0.168572
	ttest		0.00055108

## Sheet: Fig. 2A (2)
10g
	1G	6G	10G	100G	500G
1	25	25.8427	70.6667	71.4286	69.0355
2	28.6957	32.7869	64.3275	58.9928	61.1511
3	33.7449	37.1795	56.4516	56.0241	76.6423
4	32.4841	36.4238	55.3846	59.6639	61.7978
5			46.2366
average	29.9811	33.0582	58.6134	61.5273	67.1567
stdev	3.95367	5.17847	9.30345	6.78765	7.26391
var	15.6315	26.8165	86.5541	46.0722
trial	4	4	5	4	4
sqrt	2	2	2.23607	2	2
std.error	1.97683	2.58923	4.16063	3.39382	3.63195
ttest		0.381338	0.000738694	0.000199011	0.000105916
				Anova: Single Factor								t-Test: Two-Sample Assuming Equal Variances					t-Test: Two-Sample Assuming Equal Variances					t-Test: Two-Sample Assuming Equal Variances					t-Test: Two-Sample Assuming Equal Variances
				SUMMARY									1G	6G				1G	10G				1G	100G				1G	500G
				Groups	Count	Sum	Average	Variance				Mean	29.9811	33.0582			Mean	29.9811	58.6134			Mean	29.9811	61.5273			Mean	29.9811	67.1567
				1G	4	119.925	29.9811	15.6315				Variance	15.6315	26.8165			Variance	15.6315	86.5541			Variance	15.6315	46.0722			Variance	15.6315	52.7644
				6G	4	132.233	33.0582	26.8165				Observations	4	4			Observations	4	5			Observations	4	4			Observations	4	4
				10G	5	293.067	58.6134	86.5541				Pooled Variance	21.224				Pooled Variance	56.1587				Pooled Variance	30.8518				Pooled Variance	34.1979
				100G	4	246.109	61.5273	46.0722				Hypothesized Mean Difference	0				Hypothesized Mean Difference	0				Hypothesized Mean Difference	0				Hypothesized Mean Difference	0
				500G	3	206.829	68.943	60.0012				df	6				df	7				df	6				df	6
												t Stat	-0.944583				t Stat	-5.69561				t Stat	-8.03196				t Stat	-8.99026
												P(T<=t) one-tail	0.190669				P(T<=t) one-tail	0.000369347				P(T<=t) one-tail	9.95057e-05				P(T<=t) one-tail	5.2958e-05
				ANOVA								t Critical one-tail	1.94318				t Critical one-tail	1.89458				t Critical one-tail	1.94318				t Critical one-tail	1.94318
				Source of Variation	SS	df	MS	F	P-value	F crit		P(T<=t) two-tail	0.381338	NS			P(T<=t) two-tail	0.000738694	*			P(T<=t) two-tail	0.000199011	*			P(T<=t) two-tail	0.000105916	*
				Between Groups	4729.92	4	1182.48	24.2385	2.12652e-06	3.05557		t Critical two-tail	2.44691				t Critical two-tail	2.36462				t Critical two-tail	2.44691				t Critical two-tail	2.44691
				Within Groups	731.78	15	48.7853
				Total	5461.7	19											Bonferroni	0.01	*

## Sheet: Fig. 2B
																									centrifuged young adults				Adult worms
		control	3hr 100g			control	6hr 100g			control	100g-10hr	100g (4-18hr)				control	100g 18hr	100g- 60hr			control	100g-72hr			control	3hr 100g			control	100g-60hr
		25.7282	30.6548			22.973	25			27.4648	34.8485	36.8794			1	23.5294	58.9474	71.4286			18.18	41.67			25.7282	30.6548			40.5405	57.1429
		22.3684	30.8458			28.3688	26.7974			22.7273	40.5405	51.0638			2	28.1553	52.8302	58.9928			21.05	30.77			22.3684	30.8458			29.4118	61.4286
		29.3333	18.0212			36.7769	26.9565			42.9825	54.7826	53.0435			3	27.2727	54.8387	56.0241			9.09	36.36			29.3333	18.0212			19.1177	41.2698
		29.1262	28.5156			19.3333	25.4902			27.1429	38.326	24.2152			4	11.1111	55.7692	59.6639			6.45	59.09			29.1262	28.5156			47.4074	53.7634
		26.3006	32.0388			21.0526	23.2558		average	30.0793	42.1244	41.3005			average	22.5171	55.5964	61.5273			15.4	45.8			26.3006	32.0388			46.4286	14.2857
	average	26.5713	28.0152		average	25.7009	25.5		stdev	8.86946	8.75796	13.4743			std.dev	7.86399	2.54852	6.78765			11.1	50		average	26.5713	28.0152		AVG	36.5812	45.5781
	stdev	2.85503	5.7293		stdev	7.06025	1.50758		var	78.6674	76.7019	181.557			var	61.8424	6.49496	46.0722		average	13.545	43.9483		stdev	2.85503	5.7293		STD	12.1061	19.0378
	var	8.1512	32.8249		var	49.8471	2.27278		trial	4	4	4			trial	4	4	4		stdev	5.61094	10.0575		var	8.1512	32.8249		var	146.558	362.439
	trial	5	5		trial	5	5		sqrt	2	2	2			sqrt	2	2	2		var	31.4827	101.153		trial	5	5		trial	5	5
	sqrt	2.23607	2.23607		sqrt	2.23607	2.23607		std.err	4.43473	4.37898	6.73716			std.error	3.932	1.27426	3.39382		trial	6	6		sqrt	2.23607	2.23607		sqrt	2.23607	2.23607
	std.err	1.27681	2.56222		std.err	3.15744	0.674208		ttest		0.101476	0.220868			ttest		0.000203032	0.000288344		sqrt	2.44949	2.44949		std.err	1.27681	2.56222		std.error	5.41401	8.51398
	ttest	0.632359			ttest	0.953123														std.err	2.29066	4.10594		ttest	0.632359			ttest	0.398577
																				ttest	0.000213028
		1G	std.error
	3hr	26.5713	1.27681
	6hr	25.7009	3.15744
	10hr	30.0793	4.43473
	4-18hr	30.0793	6.11698
	18hr	22.5171	3.932
	60hr	22.5171	3.932
	72hr	13.545	2.29066
	3hr	26.5713	1.27681
	60hr	36.5812	5.41401
		100g	std.error
	3hr	28.0152	2.56222
	6hr	25.5	1.5346
	10hr	42.1244	4.37898
	4-18hr	41.3005	6.73716
	18hr	55.5964	1.27426
	60hr	61.5273	3.39382
	72hr	43.9483	4.10594
	3hr	32.0388	2.56222
	60hr	45.5781	8.51398

## Sheet: Fig 3B 
		1G
		VD1	VD2/DD1	VD3	DD2	VD4	VD5	DD3	VD6	VD7	DD4	VD8	VD9	DD5	VD10	VD11	VD12	DD6	VD13
		1h	2h	1	2	3	4	5	6	7	8	9	10	11	12	13	14	15	16	total defective axon	total worms
	2.4.2015	0	0	0		0	0	1	2	1	5	10	0	4	0	1	0	0	0	24	55
	6.4.2015	0	0	0	0	0	1	0	0	0	0	1	1	0	2	1	0	0	0	6	10
	1.5.2015	0	0	1	1	1	0	0	1	1	0	1	0	0	0	0	0	0	0	6	24
	18.5.2015	0	0	5	0	6	0	5	0	7	0	8	2	0	4	0	0	2	2	41	40
	19.5.2015	0	0	1	0	5	1	6	5	0	0	4	0	0	2	0	0	0	3	27	39
	23.2.2016	0	0	0	0	0	4	1	0	5	0	0		0	1	0	0	0	1	12	108
	22.1.2016	0	0	2	1	2	4	0	5	3	2	3	2	1	0	0	0	0	2	27	132
	3.3.2016	0	0	1	0	4	5	3	5	9	0	0		0	0	0	1	0	3	31	119
	26.2.2016	1		4	1	7	6	2	6	4	1	2	1			1	1	1	2	40	103
	total	1	0	14	3	25	21	18	24	30	8	29	6	5	9	3	2	3	13	214	630
	percentage1/	0.46729	0	6.54206	1.40187	11.6822	9.81308	8.41121	11.215	14.0187	3.73832	13.5514	2.80374	2.33645	4.20561	1.40187	0.934579	1.40187	6.07477
	trial	9
		100G
		VD1	VD2/DD1	VD3	DD2	VD4	VD5	DD3	VD6	VD7	DD4	VD8	VD9	DD5	VD10	VD11	VD12	DD6	VD13
		1h	2h	1	2	3	4	5	6	7	8	9	10	11	12	13	14	15	16	total defective axon	total worms
	2.4.2015	0	0	3	0	2	0	0	7	0	5	10	1	4	1	0	0	0	0	33	21
	6.4.2015	0	0	1	1	0	12	13	14	9	0	15	6	7	0	0	0	2	1	81	26
	1.5.2015	0	0	0	0	2	3	7	0	5	0	9	1	2	0	0	0	2	3	34	21
	18.5.2015	0	0	5	2	7	1	1	4	9	9	12	3	0	0	2	0	0	3	58	15
	19.5.2015	0	0	4	0	8	1	5	0	8	0	13	2	0	2	0	0	0	6	49	61
	23.2.2016	0	0	6	4	14	17	4	26	13	0	2	7	0	1	0	0	4	7	105	119
	22.01.2016	0	0	15	4	26	24	5	18	12	4	2	2	1	3	2	1	3	8	130	166
	3.3.2016	0	0	6	3	8	10	2	6	9	0	2	2	1	0	1	0	1	3	54	63
	26.2.2016	2	1	8	0	10	8	4	14	11	3	0	4	1	1	0	0	0	3	70	139
	total	2	1	48	14	77	76	41	89	76	21	65	28	16	8	5	1	12	34	614	631
	%defect	0.325733	0.162866	7.81759	2.28013	12.5407	12.3779	6.67752	14.4951	12.3779	3.4202	10.5863	4.56026	2.60586	1.30293	0.814332	0.162866	1.9544	5.53746
	trial	9
		VD1	VD2/DD1	VD3	DD2	VD4	VD5	DD3	VD6	VD7	DD4	VD8	VD9	DD5	VD10	VD11	VD12	DD6	VD13	total axon defect	total worms
axon defect	1G	1	0	14	3	25	21	18	24	30	8	29	6	5	9	3	2	3	13	214	630
	100G	2	1	48	14	77	76	41	89	76	21	65	28	16	8	5	1	12	34	614	631
% of overall axon defect	1G	0.46729	0	6.54206	1.40187	11.6822	9.81308	8.41121	11.215	14.0187	3.73832	13.5514	2.80374	2.33645	4.20561	1.40187	0.934579	1.40187	6.07477
	100G	0.325733	0.162866	7.81759	2.28013	12.5407	12.3779	6.67752	14.4951	12.3779	3.4202	10.5863	4.56026	2.60586	1.30293	0.814332	0.162866	1.9544	5.53746
	1G	0.0015873	0	0.0222222	0.0047619	0.0396825	0.0333333	0.0285714	0.0380952	0.047619	0.0126984	0.0460317	0.00952381	0.00793651	0.0142857	0.0047619	0.0031746	0.0047619	0.0206349
	100G	0.00316957	0.00158479	0.0760697	0.022187	0.122029	0.120444	0.0649762	0.141046	0.120444	0.0332805	0.103011	0.044374	0.0253566	0.0126783	0.00792393	0.00158479	0.0190174	0.0538827
% of defect per commissure	1G	0.0285714	0	0.4	0.0857143	0.714286	0.6	0.514286	0.685714	0.857143	0.228571	0.828571	0.171429	0.142857	0.257143	0.0857143	0.0571429	0.0857143	0.371429
	100G	0.0570523	0.0285261	1.36926	0.399366	2.19651	2.16799	1.16957	2.53883	2.16799	0.599049	1.8542	0.798732	0.456418	0.228209	0.142631	0.0285261	0.342314	0.969889
																						total axon defect	total worms
				VD1	VD2/DD1	VD3	DD2	VD4	VD5	DD3	VD6	VD7	DD4	VD8	VD9	DD5	VD10	VD11	VD12	DD6	VD13	214	630
		% of overall axon defects	1G	0.46729	0	6.54206	1.40187	11.6822	9.81308	8.41121	11.215	14.0187	3.73832	13.5514	2.80374	2.33645	4.20561	1.40187	0.934579	1.40187	6.07477	614	631
			100G	0.325733	0.162866	7.81759	2.28013	12.5407	12.3779	6.67752	14.4951	12.3779	3.4202	10.5863	4.56026	2.60586	1.30293	0.814332	0.162866	1.9544	5.53746
		% defect per commissure	1G	0.0285714	0	0.4	0.0857143	0.714286	0.6	0.514286	0.685714	0.857143	0.228571	0.828571	0.171429	0.142857	0.257143	0.0857143	0.0571429	0.0857143	0.371429
			100G	0.0570523	0.0285261	1.36926	0.399366	2.19651	2.16799	1.16957	2.53883	2.16799	0.599049	1.8542	0.798732	0.456418	0.228209	0.142631	0.0285261	0.342314	0.969889
		DD	VD	Total animals	total dd	total vd	%defectDD	%vd defect												DD	VD	Total animals	total dd	total vd	%defectDD	%vd defect
	1G	33	156	624	3744	8112	0.88141	1.92308											1G	33	156	624	3744	8112	0.88141	1.92308
	100G	104	510	614	3684	7982	2.82302	6.38938											100G	104	510	614	3684	7982	2.82302	6.38938

## Sheet: Fig. 3C
	1G
		percentage
		1ventral	ventral sublateral	dorsal sublateral	dorsal
		3.33333	0	83.3333	13.3333
		5.88235	0	50	44.1176
		0	0	72.7273	27.2727
	average	3.0719	0	68.6869	28.2412

## Sheet: Fig. 3D
	Fig. 3D
	100G	percentage
		ventral	ventral sublateral	dorsal sub lateral	dorsal
		2.73973	0	94.5205	2.73973
		3.0303	0	84.8485	12.1212
		0.900901	0.900901	80.1802	18.018
	average	2.22364	0.3003	86.5164	10.9597

## Sheet: Fig. 4B
	1G	Worm number		Defective axon phenotype										100g
		normal	defect	branched	moved away	stop	Joined and reach	total defective axons	branched	moved away	Stop	joined and reach		normal	defect	branched	moved away	stop	joined and reach	total defective axons	branched	moved away	stop	Joined and reach
		96	12	1	11	2	1	15	6.66667	73.3333	13.3333	6.66667		48	71	10	99	8	2	119	8.40336	83.1933	6.72269	1.68067
		96	25	2	22	2	2	28	7.14286	78.5714	7.14286	7.14286		73	93	13	118	5	3	139	9.35252	84.8921	3.59712	2.15827
		91	28	2	25	3	1	31	6.45161	80.6452	9.67742	3.22581		18	45	4	46	5	1	56	7.14286	82.1429	8.92857	1.78571
		74	29	2	33	3	1	39	5.12821	84.6154	7.69231	2.5641		50	56	4	63	3	3	73	5.47945	86.3014	4.10959	4.10959
								average	6.34734	79.2913	9.46148	4.89986								average	7.59455	84.1324	5.83949	2.43356
								stdev	0.86255	4.69732	2.80142	2.33886								stdev	1.67554	1.83683	2.47273	1.13599
	axon defect							trial	4	4	4	4								trial	4	4	4	4
								sqrt	2	2	2	2								sqrt	2	2	2	2
								std.error	0.431275	2.34866	1.40071	1.16943								std.error	0.83777	0.918413	1.23637	0.567994
																				ttest	0.23382	0.103315	0.100631	0.21576
		Branched	Turn and extend	Stop	Joined and reach
	1G	6.34734	79.2913	9.46148	4.89986
	std.error	0.431275	2.34866	1.40071	1.16943
	100G	7.59455	84.1324	5.83949	2.43356
	std.error	0.83777	0.918413	1.23637	0.567994
		1G	6G	10G	100G
	average		2.07825	3.2563	7.75344
			0.287277	0.231146	0.554085

## Sheet: table 1
	Animals analysed at L4/young adults
		DD	VD	Total animals	total dd	total vd	%defectDD	%vd defect
	1G	37	177	630	3780	8190	0.978836	2.16117
	100G	104	510	631	3786	8203	2.74696	6.21724
	Scoring of dd neurons and its commisures in L1 stage after exposing synchronized eggs to 100G for 15 hr
	DD neurons(L1 stage)		1G					100G
	normal	defect	total	% of normal	% of defect		normal	defect	total	% of normal
	82	0	82	100	0		41	0	41	100
	77	0	77	100	0		68	0	68	100
	69	0	69	100	0		84	0	84	100
	147	0	147	100	0		123	0	123	100
total	375						316
		unc-129::GFP cholinergic neurons DA and DB
	1G							100G 60hr
	normal	defect	total	%normal				normal	defect	total	% normal
	60	0	60	100				76	0	76	100
	42	0	42	100				42	0	42	100
total	102						total	118
	mec-4gfP worms centrifuge at 100G for 60hr
		1G						100G
	normal	defect	total	% of normal	% of defect			normal	defect	total	% of normal	% of defect
	20	0	50	100	0			15	0	45	100	0

## Sheet: oxIs12 unc-47GFP
	unc-47P::GFP(oxIs12) synchronized eggs subject to 100G for 2.5D
		Control								100G
	normal	defect	total	% of normal	% of defect				normal	defect	total	% of normal	% of defect
2015-11-14	144	5	149	96.6443	3.3557				148	23	171	86.5497	13.4503
2015-11-16	98	15	113	86.7257	13.2743				125	13	138	90.5797	9.42029
2015-11-27	116	19	135	85.9259	14.0741				156	27	183	85.2459	14.7541
		% of defect
		1G	100G
		3.3557	13.4503
		13.2743	9.42029
		14.0741	14.7541
	average	10.2347	12.5416
	STd.dev	5.97079	2.7806
	variance	35.6504	7.73172
	trial	3	3
	sqrt	1.73205	1.73205
	std.error	3.44724	1.60538
	500G -2 Days from synchronized egss
2015-11-23	81	9	90	90	10				86	6	92	93.4783	6.52174
